# Supplementary material
Source: PubMed Central journal article supplement (PMC2650169)
Supplement: 0810682106_0810682106SI.pdf [file 0810682106_0810682106SI.pdf]

# Supporting Information

Kells et al. 10.1073/pnas.0810682106

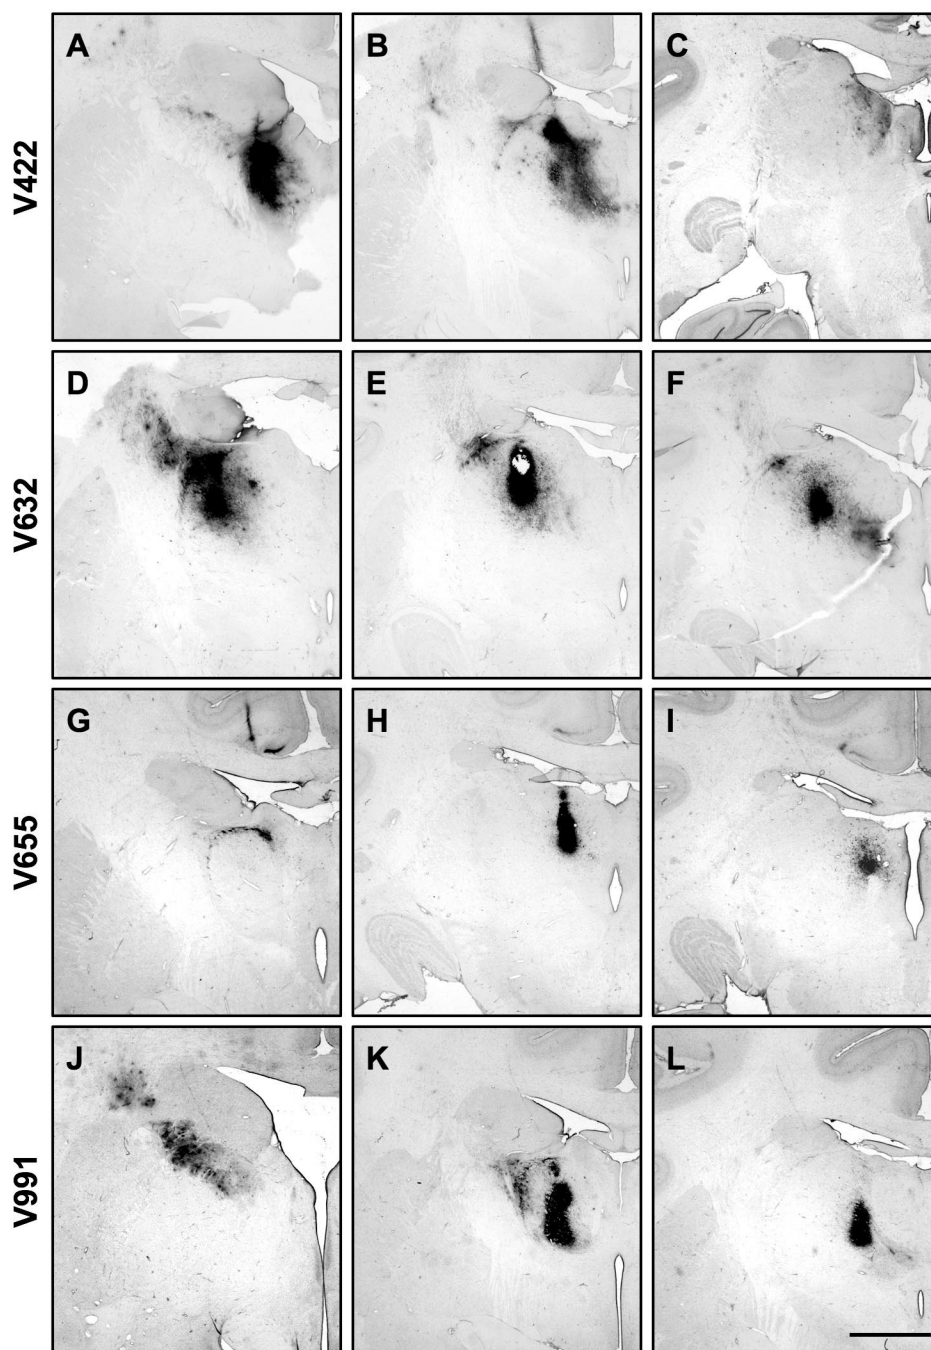

**Fig. S1.** Distribution of GFP expression in the left thalami of 4 monkeys after CED of AAV2-GFP. Immunohistochemistry staining for GFP on 3 coronal histological sections for each NHP ( $\approx 3$  mm between sections) is shown, covering the extent of AAV2-GFP transduction in the thalamus. Monkey IDs: A–C, V422; D–F, V632; G–I, V655; J–L, V991. (Scale bar: 5 mm.)
